# Supplementary material
Source: publisher figshare collection journal article supplement (https://brill.figshare.com/ndownloader/files/27898989)
Supplement: Supplementary file 1 [file 27898989]

**Supplementary Table S1.** Conditions for GC-O/FID.

| GC-FID: GC2010plus (Shimadzu) |
| --- |
| Column:  J&W DB-5 ms (5% phenyl-95% methylsilicone) fused silica capillary column, 30 m × 0.25 mm i.d., 0.25 µm film; GL Science, IneretCap Pure-WAX(polyethylene glycol) fused capillary column, 60 m × 0.32 mm i.d., 0.5 μm film |
| Temperature programme: 5 min at 45°C, 10°C min–1 to 240°C, 15 min |
| Injector: 240°C |
| FID: 240°C |
| Injection method: split mode (3:1) |
| Carrier gas: He, 4 ml min–1, constant flow mode |
|  |
| GC-O system: Olfactory detector port OP275, GL Science |
| Transfer line: 240°C |
